# Supplementary material for: Spatial and Temporal Volatility of PM2.5, PM10 and PM10-Bound B[a]P Concentrations and Assessment of the Exposure of the Population of Silesia in 2018–2021
Source: MDPI journal article supplement (doi:10.3390/ijerph20010138), 2022-12-22
Supplement: s1 [file s1]

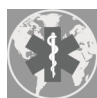

Supplementary

# Spatial and temporal volatility of PM<sub>2.5</sub>, PM<sub>10</sub>, and PM<sub>10</sub>-bound B[a]P concentrations and assessment of the exposure of the population of Silesia in 2018-2021

Dorota Kaleta and Barbara Kozielska\*

Department of Air Protection, Silesian University of Technology, 22B Konarskiego St., 44-100 Gliwice, Poland

\* Correspondence: barbara.kozielska@polsl.pl; Tel.: +48-32-237-15-30

**Table S1.** Detailed information on the location of selected urban background air quality monitoring stations in the Silesian Voivodeship.

| No. | Measurement stations |                          |                              | PM <sub>2.5</sub> | PM <sub>10</sub> | B[a]P |
|-----|----------------------|--------------------------|------------------------------|-------------------|------------------|-------|
| 1.  | Bielsko-Biała        | 19 Kossak-Szczuckiej St. | 49°48'48.5"N<br>19°01'38.3"E | +) )              | +                | +     |
| 2.  | Częstochowa          | 2 Baczyńskiego St.       | 50°50'11.0"N<br>19°07'48.4"E | +) )              | +                | +     |
| 3.  | Dąbrowa<br>Górnica   | 25a Tysiąclecia St.      | 50°19'44.8"N<br>19°13'52.4"E |                   | +                | +     |
| 4.  | Godów                | Gliniki St.              | 49°55'18.8"N<br>18°28'16.6"E | +                 | +                | +     |
| 5.  | Katowice             | 6 Kossutha St.           | 50°15'52.6"N<br>18°58'30.1"E | +                 | +                | +     |
| 6.  | Knurów               | 5 Jedności Narodowej St. | 50°13'59.4"N<br>18°39'20.6"E |                   | +                | +     |
| 7.  | Myszków              | 3 Miedziana St.          | 50°34'47.0"N<br>19°19'36.1"E |                   | +                | +     |
| 8.  | Pszczyna             | Bogedaina St.            | 49°58'19.8"N<br>18°56'50.0"E |                   | +                | +     |
| 9.  | Rybnik               | 37d Borki St.            | 50°06'40.3"N<br>18°30'58.1"E |                   | +                | +     |
| 10. | Tarnowskie<br>Góry   | Litewska St.             | 50°26'41.1"N<br>18°49'46.7"E | +                 | +                | +     |

|     |        |                   |                              |   |   |
|-----|--------|-------------------|------------------------------|---|---|
| 11. | Żywiec | 83a Kopernika St. | 49°40'17.8"N<br>19°14'04.0"E | + | + |
|-----|--------|-------------------|------------------------------|---|---|

<sup>a</sup> from 2021

**Table S2.** Descriptive statistics of concentrations of PM<sub>2.5</sub>, PM<sub>10</sub> and PM-bound B[a]P in the period 2018–2021.

| Measurement stations                      | N   | Mean  | SD    | Median | Min   | Max    | Coefficient of variation, % |
|-------------------------------------------|-----|-------|-------|--------|-------|--------|-----------------------------|
| <b>PM<sub>10</sub>, µg·m<sup>-3</sup></b> |     |       |       |        |       |        |                             |
| <b>2018</b>                               |     |       |       |        |       |        |                             |
| Bielsko Biała                             | 346 | 34.35 | 23.29 | 26.15  | 7.80  | 200.60 | 67.79                       |
| Częstochowa                               | 344 | 33.40 | 19.46 | 26.55  | 10.20 | 162.70 | 58.28                       |
| Dąbrowa Górnicza                          | 346 | 41.83 | 26.25 | 34.45  | 9.10  | 196.60 | 62.75                       |
| Godów                                     | 336 | 45.58 | 40.10 | 28.50  | 6.30  | 242.60 | 87.99                       |
| Katowice                                  | 361 | 40.00 | 24.26 | 32.90  | 10.40 | 181.90 | 60.65                       |
| Knurów                                    | 357 | 42.00 | 30.05 | 31.80  | 9.40  | 210.30 | 71.54                       |
| Myszków                                   | 333 | 49.10 | 38.38 | 33.40  | 9.10  | 230.60 | 78.18                       |
| Pszczyna                                  | 362 | 54.88 | 44.72 | 36.95  | 2.70  | 272.90 | 81.49                       |
| Rybnik                                    | 361 | 50.76 | 43.43 | 33.70  | 9.30  | 310.70 | 85.56                       |
| Tarnowskie Góry                           | 365 | 38.82 | 24.80 | 29.90  | 7.80  | 168.90 | 63.88                       |
| Żywiec                                    | 335 | 44.33 | 36.50 | 29.80  | 8.20  | 240.70 | 82.34                       |
| <b>2019</b>                               |     |       |       |        |       |        |                             |
| Bielsko Biała                             | 349 | 27.54 | 19.88 | 20.40  | 4.00  | 216.00 | 72.18                       |
| Częstochowa                               | 363 | 26.32 | 15.85 | 20.10  | 12.40 | 126.60 | 60.24                       |
| Dąbrowa Górnicza                          | 351 | 32.91 | 22.26 | 25.90  | 8.80  | 130.90 | 67.63                       |
| Godów                                     | 340 | 38.03 | 31.23 | 25.80  | 9.70  | 211.80 | 82.13                       |
| Katowice                                  | 356 | 33.00 | 19.58 | 26.40  | 12.10 | 162.90 | 59.33                       |
| Knurów                                    | 349 | 35.04 | 27.49 | 25.90  | 8.50  | 180.30 | 78.45                       |
| Myszków                                   | 274 | 40.26 | 34.31 | 28.30  | 9.60  | 248.10 | 85.22                       |
| Pszczyna                                  | 358 | 44.29 | 39.12 | 29.00  | 10.10 | 248.80 | 88.31                       |
| Rybnik                                    | 356 | 42.97 | 41.06 | 27.45  | 9.10  | 271.80 | 95.57                       |
| Tarnowskie Góry                           | 359 | 33.96 | 23.14 | 26.10  | 14.40 | 211.00 | 68.16                       |
| Żywiec                                    | 341 | 32.57 | 23.49 | 23.00  | 8.30  | 129.40 | 72.12                       |
| <b>2020</b>                               |     |       |       |        |       |        |                             |
| Bielsko Biała                             | 144 | 27.22 | 20.18 | 20.00  | 7.00  | 148.00 | 74.17                       |
| Częstochowa                               | 365 | 22.87 | 11.07 | 19.40  | 4.40  | 84.30  | 48.41                       |
| Dąbrowa Górnicza                          | 357 | 29.01 | 16.34 | 24.20  | 6.60  | 94.90  | 56.33                       |
| Godów                                     | 310 | 31.19 | 23.78 | 24.20  | 6.50  | 146.80 | 76.23                       |
| Katowice                                  | 365 | 28.74 | 14.15 | 24.90  | 9.40  | 112.80 | 49.22                       |
| Knurów                                    | 362 | 28.76 | 18.20 | 24.40  | 5.60  | 131.50 | 63.26                       |
| Myszków                                   | 315 | 35.28 | 24.17 | 27.50  | 7.70  | 155.30 | 68.49                       |

|                 |     |       |       |       |      |        |       |
|-----------------|-----|-------|-------|-------|------|--------|-------|
| Pszczyna        | 351 | 38.34 | 27.62 | 30.30 | 8.20 | 179.30 | 72.05 |
| Rybnik          | 359 | 32.56 | 24.18 | 25.70 | 5.10 | 178.60 | 74.26 |
| Tarnowskie Góry | 358 | 28.77 | 15.50 | 24.00 | 4.20 | 104.40 | 53.87 |
| Żywiec          | 365 | 33.34 | 29.08 | 23.00 | 6.90 | 295.80 | 87.22 |

## 2021

|                  |     |       |       |       |      |        |       |
|------------------|-----|-------|-------|-------|------|--------|-------|
| Bielsko Biała    | 318 | 25.65 | 18.67 | 20.30 | 3.80 | 143.50 | 72.78 |
| Częstochowa      | 362 | 26.08 | 19.89 | 20.20 | 2.20 | 170.30 | 76.26 |
| Dąbrowa Górnicza | 337 | 33.02 | 21.73 | 26.90 | 4.70 | 145.90 | 65.80 |
| Godów            | 343 | 35.72 | 31.21 | 24.10 | 7.20 | 217.80 | 87.38 |
| Katowice         | 347 | 26.76 | 22.33 | 18.40 | 3.50 | 158.20 | 83.44 |
| Knurów           | 365 | 32.22 | 24.00 | 24.90 | 4.10 | 188.00 | 74.50 |
| Myszków          | 276 | 36.97 | 28.51 | 27.10 | 5.90 | 166.40 | 77.12 |
| Pszczyna         | 364 | 38.84 | 31.10 | 28.40 | 3.40 | 183.50 | 80.07 |
| Rybnik           | 365 | 35.15 | 28.24 | 25.40 | 5.70 | 169.90 | 80.32 |
| Tarnowskie Góry  | 365 | 27.96 | 19.40 | 22.50 | 3.90 | 149.00 | 69.40 |
| Żywiec           | 364 | 37.10 | 30.59 | 26.35 | 6.00 | 173.70 | 82.45 |

PM2.5,  $\mu\text{g}\cdot\text{m}^{-3}$ 

## 2018

|                 |     |       |       |       |      |        |       |
|-----------------|-----|-------|-------|-------|------|--------|-------|
| Bielsko Biała   | 0   |       |       |       |      |        |       |
| Częstochowa     | 0   |       |       |       |      |        |       |
| Godów           | 333 | 38.55 | 34.39 | 23.50 | 5.20 | 218.90 | 89.23 |
| Katowice        | 339 | 29.99 | 21.35 | 22.10 | 7.90 | 142.40 | 71.18 |
| Tarnowskie Góry | 364 | 28.97 | 21.22 | 20.80 | 3.50 | 140.10 | 73.26 |

## 2019

|                 |     |       |       |       |      |        |       |
|-----------------|-----|-------|-------|-------|------|--------|-------|
| Bielsko Biała   | 0   |       |       |       |      |        |       |
| Częstochowa     | 0   |       |       |       |      |        |       |
| Godów           | 329 | 30.61 | 27.50 | 20.40 | 6.80 | 228.60 | 89.83 |
| Katowice        | 358 | 24.10 | 17.22 | 18.20 | 6.50 | 126.10 | 71.47 |
| Tarnowskie Góry | 357 | 22.78 | 18.42 | 17.20 | 7.10 | 174.30 | 80.86 |

## 2020

|                 |     |       |       |       |      |        |       |
|-----------------|-----|-------|-------|-------|------|--------|-------|
| Bielsko Biała   | 0   |       |       |       |      |        |       |
| Częstochowa     | 0   |       |       |       |      |        |       |
| Godów           | 281 | 26.47 | 21.83 | 19.10 | 3.50 | 136.30 | 82.50 |
| Katowice        | 365 | 20.19 | 11.52 | 16.30 | 5.70 | 84.90  | 57.07 |
| Tarnowskie Góry | 366 | 19.62 | 12.01 | 15.85 | 2.70 | 79.20  | 61.19 |

## 2021

|               |     |       |       |       |      |        |       |
|---------------|-----|-------|-------|-------|------|--------|-------|
| Bielsko Biała | 365 | 20.80 | 19.11 | 14.10 | 1.00 | 134.40 | 91.85 |
| Częstochowa   | 342 | 21.09 | 16.24 | 15.95 | 1.00 | 113.50 | 77.00 |
| Godów         | 185 | 33.91 | 31.71 | 21.30 | 6.70 | 193.80 | 93.51 |
| Katowice      | 361 | 22.65 | 17.11 | 17.10 | 3.50 | 132.20 | 75.51 |

|                                          |     |       |       |       |      |        |        |
|------------------------------------------|-----|-------|-------|-------|------|--------|--------|
| Tarnowskie Góry                          | 357 | 20.94 | 16.86 | 15.70 | 1.00 | 122.10 | 80.53  |
| <b>PM-bound B[a]P, ng·m<sup>-3</sup></b> |     |       |       |       |      |        |        |
| 2018                                     |     |       |       |       |      |        |        |
| Bielsko Biała                            | 351 | 4.47  | 5.47  | 2.31  | 0.15 | 20.13  | 122.48 |
| Częstochowa                              | 347 | 3.02  | 2.95  | 2.03  | 0.02 | 9.70   | 97.88  |
| Dąbrowa Górnicza                         | 181 | 5.12  | 5.55  | 2.98  | 0.11 | 16.00  | 108.33 |
| Godów                                    | 340 | 9.26  | 11.83 | 4.14  | 0.17 | 54.18  | 127.69 |
| Katowice                                 | 365 | 4.73  | 4.87  | 3.29  | 0.19 | 16.55  | 103.09 |
| Knurów                                   | 181 | 6.92  | 7.00  | 3.84  | 0.26 | 20.83  | 101.24 |
| Myszków                                  | 0   |       |       |       |      |        |        |
| Pszczyna                                 | 179 | 9.07  | 10.02 | 3.84  | 0.34 | 34.24  | 110.52 |
| Rybnik                                   | 365 | 13.20 | 14.07 | 9.74  | 0.31 | 49.71  | 106.61 |
| Tarnowskie Góry                          | 183 | 4.40  | 4.47  | 2.85  | 0.14 | 14.63  | 101.61 |
| Żywiec                                   | 344 | 7.99  | 8.88  | 5.51  | 0.20 | 40.13  | 111.08 |
| 2019                                     |     |       |       |       |      |        |        |
| Bielsko Biała                            | 349 | 3.51  | 3.88  | 1.51  | 0.14 | 17.72  | 110.32 |
| Częstochowa                              | 365 | 2.69  | 2.76  | 1.41  | 0.12 | 10.90  | 102.49 |
| Dąbrowa Górnicza                         | 179 | 4.38  | 4.74  | 3.47  | 0.16 | 17.68  | 108.03 |
| Godów                                    | 351 | 8.31  | 9.28  | 4.54  | 0.10 | 33.77  | 111.70 |
| Katowice                                 | 362 | 4.06  | 4.23  | 2.35  | 0.16 | 14.25  | 104.37 |
| Knurów                                   | 178 | 7.02  | 8.32  | 3.67  | 0.23 | 31.22  | 118.52 |
| Myszków                                  | 180 | 7.79  | 8.32  | 5.97  | 0.20 | 33.14  | 106.71 |
| Pszczyna                                 | 170 | 7.12  | 7.58  | 4.67  | 0.25 | 25.53  | 106.41 |
| Rybnik                                   | 361 | 13.18 | 15.50 | 7.61  | 0.16 | 62.32  | 117.57 |
| Tarnowskie Góry                          | 180 | 3.92  | 4.88  | 2.29  | 0.12 | 21.46  | 124.53 |
| Żywiec                                   | 346 | 6.10  | 6.21  | 3.49  | 0.18 | 20.79  | 101.74 |
| 2020                                     |     |       |       |       |      |        |        |
| Bielsko Biała                            | 146 | 4.69  | 5.45  | 3.06  | 0.13 | 18.83  | 116.11 |
| Częstochowa                              | 365 | 2.48  | 2.21  | 2.24  | 0.10 | 10.48  | 89.09  |
| Dąbrowa Górnicza                         | 184 | 4.03  | 3.94  | 2.85  | 0.18 | 13.58  | 97.83  |
| Godów                                    | 321 | 7.78  | 7.88  | 5.73  | 0.26 | 31.54  | 101.30 |
| Katowice                                 | 366 | 3.49  | 3.07  | 2.70  | 0.23 | 12.60  | 88.08  |
| Knurów                                   | 180 | 4.89  | 4.22  | 2.91  | 0.18 | 14.07  | 86.18  |
| Myszków                                  | 162 | 8.84  | 6.17  | 9.89  | 0.43 | 22.41  | 69.71  |
| Pszczyna                                 | 176 | 6.36  | 6.84  | 4.88  | 0.26 | 24.44  | 107.55 |
| Rybnik                                   | 364 | 9.42  | 9.14  | 7.78  | 0.38 | 42.92  | 97.08  |
| Tarnowskie Góry                          | 183 | 4.39  | 4.58  | 2.85  | 0.21 | 20.69  | 104.15 |
| Żywiec                                   | 366 | 7.82  | 8.79  | 4.52  | 0.24 | 36.49  | 112.36 |
| 2021                                     |     |       |       |       |      |        |        |
| Bielsko Biała                            | 333 | 3.75  | 4.11  | 2.39  | 0.07 | 15.81  | 109.51 |

|                  |     |       |       |      |      |       |        |
|------------------|-----|-------|-------|------|------|-------|--------|
| Częstochowa      | 365 | 2.93  | 2.92  | 2.23 | 0.11 | 14.05 | 99.61  |
| Dąbrowa Górnicza | 183 | 3.83  | 3.98  | 3.01 | 0.18 | 16.43 | 104.10 |
| Godów            | 357 | 8.91  | 9.27  | 4.14 | 0.16 | 30.46 | 104.06 |
| Katowice         | 353 | 3.64  | 3.84  | 2.02 | 0.04 | 13.74 | 105.48 |
| Knurów           | 182 | 6.12  | 5.99  | 4.65 | 0.22 | 19.64 | 97.96  |
| Myszków          | 174 | 8.82  | 7.83  | 7.84 | 0.18 | 25.88 | 88.77  |
| Pszczyna         | 183 | 5.98  | 6.47  | 3.48 | 0.25 | 24.28 | 108.05 |
| Rybnik           | 365 | 10.10 | 10.46 | 5.96 | 0.17 | 42.92 | 103.58 |
| Tarnowskie Góry  | 183 | 3.43  | 3.82  | 2.08 | 0.15 | 20.69 | 111.31 |
| Żywiec           | 364 | 8.35  | 8.86  | 5.61 | 0.16 | 29.63 | 106.10 |

stations for which 80% of the measurements were not covered during each year are marked in red

**Table S3.** Number of days exceeding the values of the daily mean concentrations of PM10 in the heating season and during the year.

|                         | 2018                       | 2019 | 2020 | 2021 | 2018                   | 2019 | 2020 | 2021 |
|-------------------------|----------------------------|------|------|------|------------------------|------|------|------|
|                         | acc. to Polish regulations |      |      |      | acc. toWHO regulations |      |      |      |
| <b>Bielsko Biała</b>    | 52*                        | 29   | 17   | 33   | 63                     | 35   | 19   | 45   |
|                         | 52**                       | 30   | 17   | 33   | 63                     | 40   | 19   | 45   |
| <b>Częstochowa</b>      | 52                         | 25   | 13   | 30   | 69                     | 35   | 20   | 40   |
|                         | 52                         | 28   | 13   | 30   | 72                     | 39   | 20   | 40   |
| <b>Dąbrowa Górnicza</b> | 80                         | 47   | 40   | 52   | 98                     | 55   | 48   | 59   |
|                         | 87                         | 52   | 40   | 53   | 113                    | 69   | 49   | 65   |
| <b>Godów</b>            | 93                         | 67   | 45   | 70   | 108                    | 81   | 51   | 81   |
|                         | 94                         | 79   | 46   | 70   | 109                    | 96   | 52   | 82   |
| <b>Katowice</b>         | 79                         | 53   | 26   | 38   | 89                     | 64   | 46   | 52   |
|                         | 81                         | 57   | 26   | 38   | 93                     | 72   | 48   | 52   |
| <b>Knurów</b>           | 93                         | 57   | 30   | 63   | 105                    | 68   | 40   | 74   |
|                         | 93                         | 63   | 30   | 63   | 108                    | 79   | 42   | 75   |
| <b>Myszków</b>          | 105                        | 50   | 56   | 63   | 111                    | 59   | 69   | 71   |
|                         | 106                        | 63   | 59   | 63   | 115                    | 74   | 72   | 71   |
| <b>Pszczyna</b>         | 121                        | 88   | 56   | 82   | 133                    | 95   | 71   | 91   |
|                         | 126                        | 107  | 77   | 83   | 139                    | 116  | 96   | 94   |
| <b>Rybnik</b>           | 113                        | 75   | 48   | 73   | 122                    | 84   | 59   | 82   |
|                         | 113                        | 88   | 51   | 73   | 125                    | 106  | 64   | 82   |
| <b>Tarnowskie Góry</b>  | 78                         | 53   | 30   | 39   | 100                    | 65   | 39   | 51   |
|                         | 78                         | 58   | 30   | 39   | 102                    | 74   | 39   | 51   |
| <b>Żywiec</b>           | 88                         | 59   | 66   | 82   | 97                     | 65   | 79   | 92   |
|                         | 88                         | 63   | 66   | 83   | 97                     | 71   | 80   | 93   |

where:  $\frac{*}{**} = \frac{\text{number of days in the heating season}}{\text{number of days in a year}}$

**Table S4.** Number of days exceeding the values of the daily mean concentrations of PM<sub>2.5</sub> in the heating season and during the year acc. to WHO regulations.

|                        | 2018 | 2019 | 2020 | 2021 |
|------------------------|------|------|------|------|
| <b>Bielsko Biala</b>   | -    | -    | -    | 150  |
|                        | -    | -    | -    | 173  |
| <b>Częstochowa</b>     | -    | -    | -    | 139  |
|                        | -    | -    | -    | 186  |
| <b>Godów</b>           | 176  | 124  | 119  | 106  |
|                        | 250  | 215  | 179  | 132  |
| <b>Katowice</b>        | 166  | 132  | 140  | 171  |
|                        | 280  | 230  | 202  | 213  |
| <b>Tarnowskie Góry</b> | 176  | 123  | 141  | 149  |
|                        | 281  | 213  | 199  | 193  |
